# Supplementary material
Source: PubMed Central journal article supplement (PMC8187276)
Supplement: NIHMS1686461-supplement-1.pdf [file NIHMS1686461-supplement-1.pdf]

**Poly (I:C)-induced maternal immune activation modifies ventral hippocampal regulation of stress reactivity: prevention by environmental enrichment**

Xin Zhao, Ruqayah Mohammed, Hieu Tran, Mary Erikson, Amanda C. Kentner\*

School of Arts & Sciences, Health Psychology Program, Massachusetts College of Pharmacy and Health Sciences, Boston Massachusetts, United States 02115

\*Corresponding author:

Amanda Kentner

[amanda.kentner@mcphs.edu](mailto:amanda.kentner@mcphs.edu)

Office #617-274-3360

Fax # 617-732-2959

**Supplementary Materials**

Supplementary Figure S1

Supplementary Table S2

Supplementary Table S3

**Supplementary Figure S1. The effects of maternal immune activation (MIA) and environmental enrichment on P70 offspring open field and P85 social investigation rearing and grooming behaviors.** Postnatal day (P) 70 open field data on the number of rears for (A) male and (B) female mice. P85 data on the number of rears for (C) male and (D) female mice during the social exposure. Grooming behavior (seconds) in (E) males and (F) females during the P70 open field test and in (G) males and (H) females during the P85 social exposure. Data are expressed as Mean  $\pm$  SEM, n=8-14 litters represented per sex, MIA, and housing group. <sup>a</sup>p < 0.05, main effect of housing; <sup>c</sup>p < 0.05, main effect of sex.

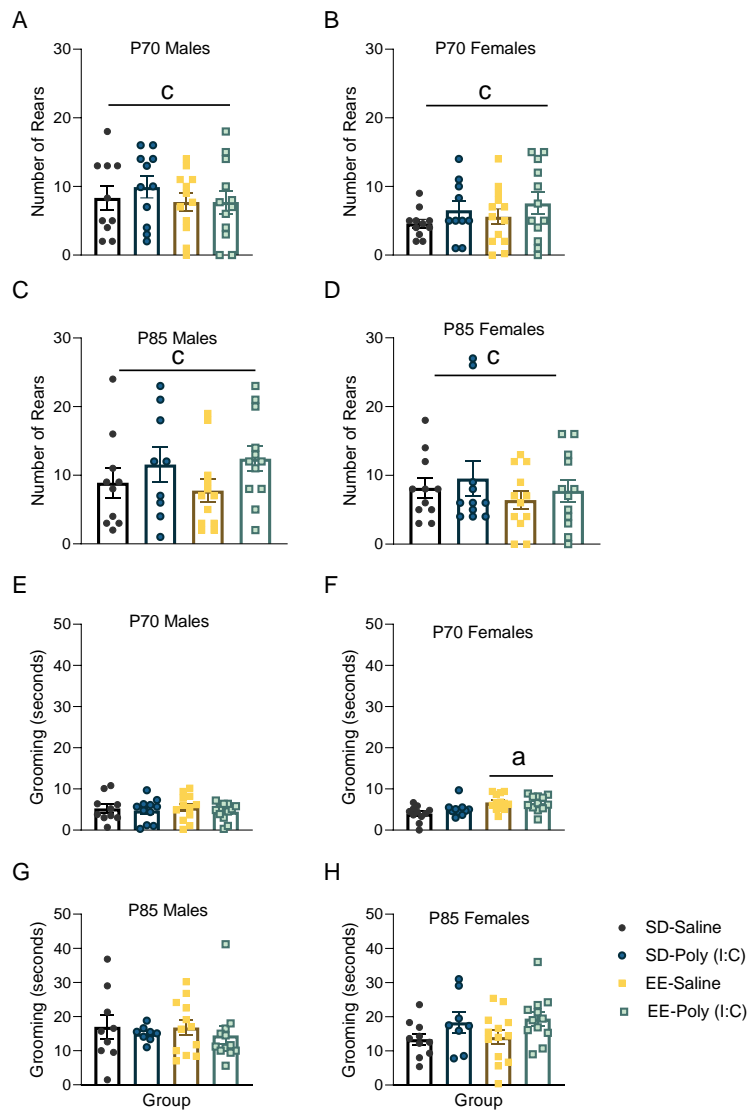

**Supplementary Table S2. Litter Designations and Treatments.**

| Number of Dams Included in Maternal Measures | Number of Offspring Included in P70 Behavioral Analyses | Number of Offspring Included in P85 Behavioral Analyses | Number of Offspring Included in qPCR Analyses | Number of Offspring Included in cFos Analyses |
|----------------------------------------------|---------------------------------------------------------|---------------------------------------------------------|-----------------------------------------------|-----------------------------------------------|
| SD-Saline; (n = 12) <sup>†</sup>             | 11 Males; 10 Females <sup>#</sup>                       | 9 Males <sup>#</sup> ; 11 Females                       | 8 Males; 8 Females                            | 7-8 Males; 9 Females                          |
| SD-Poly (I:C); (n = 14) <sup>†</sup>         | 11 Males <sup>#</sup> ; 10 Females <sup>*</sup>         | 12 Males <sup>*</sup> ; 10 Females <sup>*</sup>         | 8 Males; 8 Females                            | 7-8 Males; 7-8 Females                        |
| EE-Saline; (n = 12)                          | 12 Males; 13 Females <sup>*</sup>                       | 10 Males <sup>#</sup> ; 13 Females <sup>*</sup>         | 8 Males; 8 Females                            | 7-8 Males; 6-7 Females                        |
| EE-Poly (I:C); (n = 12)                      | 12 Males; 12 Females                                    | 12 Males; 12 Females                                    | 8 Males; 8 Females                            | 7-8 Males; 7-8 Females                        |
| N = 50 dams; N = 93 offspring                | N = 91                                                  | N = 89                                                  | N = 64                                        | N = 58-64                                     |

Note: 65 dams were bred. 8 dams lost their litters during pregnancy or had small litters (n < 4 pups) that were fostered to same age and group matched dams. These issues were primarily in the SD-Poly (I:C) group. 7 dams did not become pregnant.

<sup>#</sup>Animal not evaluated on behavioral measure due to experimenter error or video recording failure.

<sup>†</sup> Litter lost after birth.

<sup>\*</sup>Extra pups in litter represent fostered animals.

**Supplementary Table S3. mRNA gene expression in offspring exposed to maternal immune activation and housed in SD or EE**

| Brain region        | Sex           | Neural marker     | SD          |                            | EE                        |             |
|---------------------|---------------|-------------------|-------------|----------------------------|---------------------------|-------------|
|                     |               |                   | Saline      | Poly (I:C)                 | Saline                    | Poly (I:C)  |
| Prefrontal Cortex   | Males         | <i>Crh</i> **     | 1.00 ± 0.12 | 1.64 ± 0.30                | 0.85 ± 0.08               | 1.30 ± 0.28 |
|                     |               | <i>Crhr1</i> **   | 1.00 ± 0.08 | 1.30 ± 0.11                | 1.17 ± 0.11               | 1.39 ± 0.05 |
|                     |               | <i>Nr3c1</i> ##   | 1.00 ± 0.09 | 1.36 ± 0.13                | 0.76 ± 0.08               | 0.96 ± 0.16 |
|                     |               | <i>Oxt</i> †      | 1.00 ± 0.05 | 1.07 ± 0.34                | 0.56 ± 0.18 <sup>a</sup>  | 1.08 ± 0.26 |
|                     |               | <i>Avpr1a</i>     | 1.00 ± 0.63 | 2.85 ± 1.10                | 1.56 ± 0.61               | 1.66 ± 0.57 |
|                     |               | <i>Oxytr</i>      | 1.00 ± 0.15 | 1.31 ± 0.18                | 0.97 ± 0.20               | 1.04 ± 0.13 |
|                     | Females       | <i>Crh</i>        | 1.00 ± 0.20 | 0.86 ± 0.07                | 0.77 ± 0.07               | 0.73 ± 0.11 |
|                     |               | <i>Crhr1</i> **## | 1.00 ± 0.10 | 0.89 ± 0.04                | 1.51 ± 0.04               | 1.13 ± 0.07 |
|                     |               | <i>Oxt</i>        | 1.00 ± 0.34 | 0.63 ± 0.19                | 0.76 ± 0.32               | 0.44 ± 0.13 |
|                     |               | <i>Avpr1a</i>     | 1.00 ± 0.27 | 1.37 ± 0.36                | 0.97 ± 0.374              | 1.35 ± 0.40 |
|                     |               | <i>Oxytr</i>      | 1.00 ± 0.18 | 0.68 ± 0.06                | 0.84 ± 0.14               | 0.62 ± 0.06 |
|                     |               | <i>Nr3c1</i> ##   | 1.00 ± 0.09 | 1.15 ± 0.07                | 0.84 ± 0.07               | 0.80 ± 0.12 |
| Ventral Hippocampus | Males         | <i>Crh</i> ††     | 1.00 ± 0.08 | 2.71 ± 0.397 <sup>ab</sup> | 2.00 ± 0.27 <sup>ab</sup> | 1.18 ± 0.14 |
|                     |               | <i>Crhr1</i> ††   | 1.00 ± 0.10 | 1.69 ± 0.116 <sup>ab</sup> | 0.96 ± 0.17               | 0.85 ± 0.17 |
|                     |               | <i>Nr3c1</i> †††  | 1.00 ± 0.05 | 2.88 ± 0.16 <sup>ab</sup>  | 1.69 ± 0.10 <sup>a</sup>  | 1.32 ± 0.26 |
|                     |               | <i>Oxt</i>        | 1.00 ± 0.45 | 0.88 ± 0.12                | 1.01 ± 0.35               | 0.89 ± 0.22 |
|                     |               | <i>Avpr1a</i> †   | 1.00 ± 0.20 | 2.05 ± 0.38 <sup>a</sup>   | 2.25 ± 0.58               | 1.70 ± 0.26 |
|                     |               | <i>Oxytr</i> ††   | 1.00 ± 0.12 | 2.13 ± 0.29 <sup>ab</sup>  | 1.37 ± 0.27               | 1.34 ± 0.19 |
|                     |               | <i>Camk2a</i> †   | 1.00 ± 0.09 | 1.68 ± 0.16 <sup>ab</sup>  | 1.07 ± 0.06               | 1.24 ± 0.11 |
|                     |               | <i>Prkca</i> ††   | 1.00 ± 0.05 | 2.91 ± 0.19 <sup>ab</sup>  | 1.79 ± 0.15 <sup>a</sup>  | 1.44 ± 0.28 |
|                     | Females       | <i>Crh</i> †      | 1.00 ± 0.21 | 1.36 ± 0.07 <sup>b</sup>   | 0.84 ± 0.11               | 0.61 ± 0.05 |
|                     |               | <i>Crhr1</i>      | 1.00 ± 0.10 | 1.68 ± 0.32                | 1.61 ± 0.36               | 1.75 ± 0.19 |
|                     |               | <i>Nr3c1</i>      | 1.00 ± 0.20 | 1.13 ± 0.10                | 0.94 ± 0.08               | 0.63 ± 0.03 |
|                     |               | <i>Oxt</i>        | 1.00 ± 0.18 | 0.84 ± 0.18                | 0.61 ± 0.15               | 0.40 ± 0.07 |
|                     |               | <i>Avpr1a</i>     | 1.00 ± 0.26 | 1.75 ± 0.46                | 1.18 ± 0.11               | 1.04 ± 0.20 |
|                     |               | <i>Oxytr</i> ††   | 1.00 ± 0.15 | 0.61 ± 0.06 <sup>ab</sup>  | 0.76 ± 0.10               | 0.97 ± 0.10 |
| Hypothalamus        | Males         | <i>Crh</i>        | 1.00 ± 0.14 | 1.01 ± 0.43                | 1.24 ± 0.63               | 1.32 ± 0.45 |
|                     |               | <i>Crhr1</i>      | 1.00 ± 0.24 | 1.49 ± 0.54                | 0.49 ± 0.07               | 1.44 ± 0.30 |
|                     |               | <i>Nr3c1</i>      | 1.00 ± 0.27 | 2.18 ± 0.80                | 2.08 ± 0.83               | 1.36 ± 0.28 |
|                     |               | <i>Oxt</i>        | 1.00 ± 0.18 | 1.98 ± 0.95                | 2.86 ± 1.86               | 1.93 ± 0.47 |
|                     |               | <i>Avpr1a</i>     | 1.00 ± 0.13 | 0.51 ± 0.30                | 0.97 ± 0.42               | 1.02 ± 0.35 |
|                     |               | <i>Oxytr</i>      | 1.00 ± 0.22 | 1.41 ± 0.28                | 1.12 ± 0.25               | 1.20 ± 0.25 |
|                     |               | Females           | <i>Crh</i>  | 1.00 ± 0.15                | 4.52 ± 2.02               | 2.91 ± 1.32 |
|                     | <i>Crhr1</i>  |                   | 1.00 ± 0.63 | 0.25 ± 0.07                | 0.15 ± 0.09               | 0.25 ± 0.05 |
|                     | <i>Nr3c1</i>  |                   | 1.00 ± 0.26 | 1.60 ± 0.56                | 1.64 ± 0.85               | 0.77 ± 0.19 |
|                     | <i>Oxt</i>    |                   | 1.00 ± 0.17 | 1.03 ± 0.23                | 1.63 ± 0.55               | 1.54 ± 0.52 |
|                     | <i>Avpr1a</i> |                   | 1.00 ± 0.16 | 2.01 ± 0.53                | 1.34 ± 0.47               | 0.92 ± 0.16 |
|                     | <i>Oxytr</i>  |                   | 1.00 ± 0.17 | 0.58 ± 0.11                | 0.86 ± 0.22               | 0.93 ± 0.15 |

Data are mean ± SEM.

† P<0.05, significant interaction (MIA x Housing)

\* P<0.05, \*\* P<0.01, significant main effect of MIA (saline vs. poly (I:C))

# P<0.05, ## P<0.01, significant main effect of housing (SD vs. EE)

Lower case letters indicate significant differences between conditions (<sup>a</sup>different from SD-Saline, <sup>b</sup>different from EE-Poly (I:C))
